# Supplementary material
Source: PubMed Central journal article supplement (PMC5019748)
Supplement: supp_JCO.2015.65.7742_DS_2015.657742.pdf [file supp_JCO.2015.65.7742_DS_2015.657742.pdf]

**Quality of Life in patients with Advanced Cancer – Differential association with performance status and the systemic inflammatory response**

**Laird, et al**

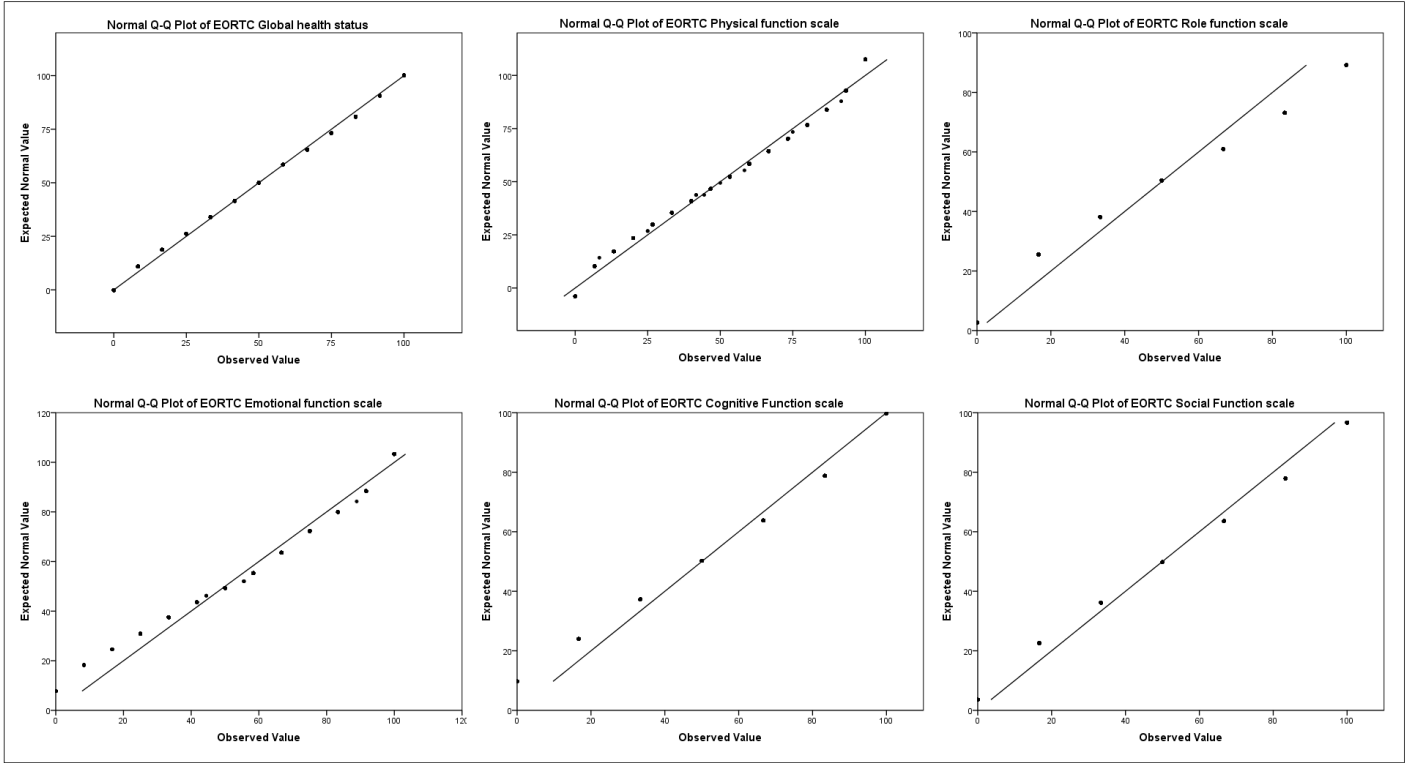

Supplementary Figure 1 – Q-Q plots of EORTC QLQ-C30 Function Scales

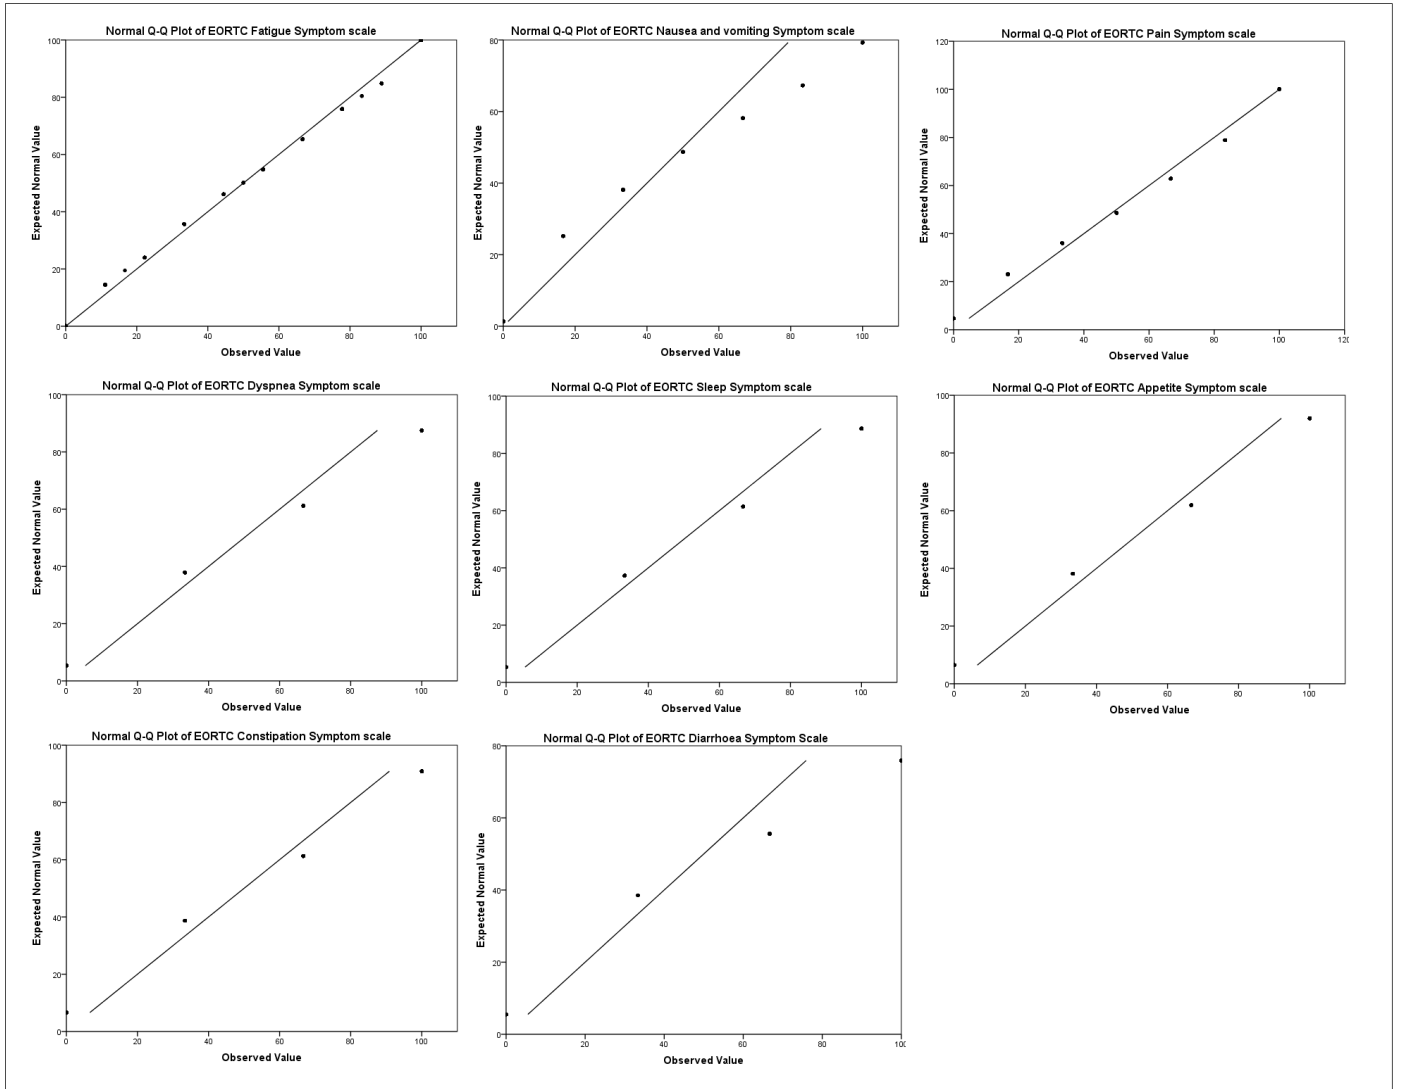

Supplementary Figure 2 – Q-Q plots of EORTC QLQ-C30 Symptom Scales
